# Supplementary material
Source: PubMed Central journal article supplement (PMC3506015)
Supplement: NIHMS418007-supplement-1.pdf [file NIHMS418007-supplement-1.pdf]

# Supplement Material

Novel Mechanism of Aortic Aneurysm Development in Mice  
Associated with Smoking and Leukocytes (ATVB/2012/300208D)

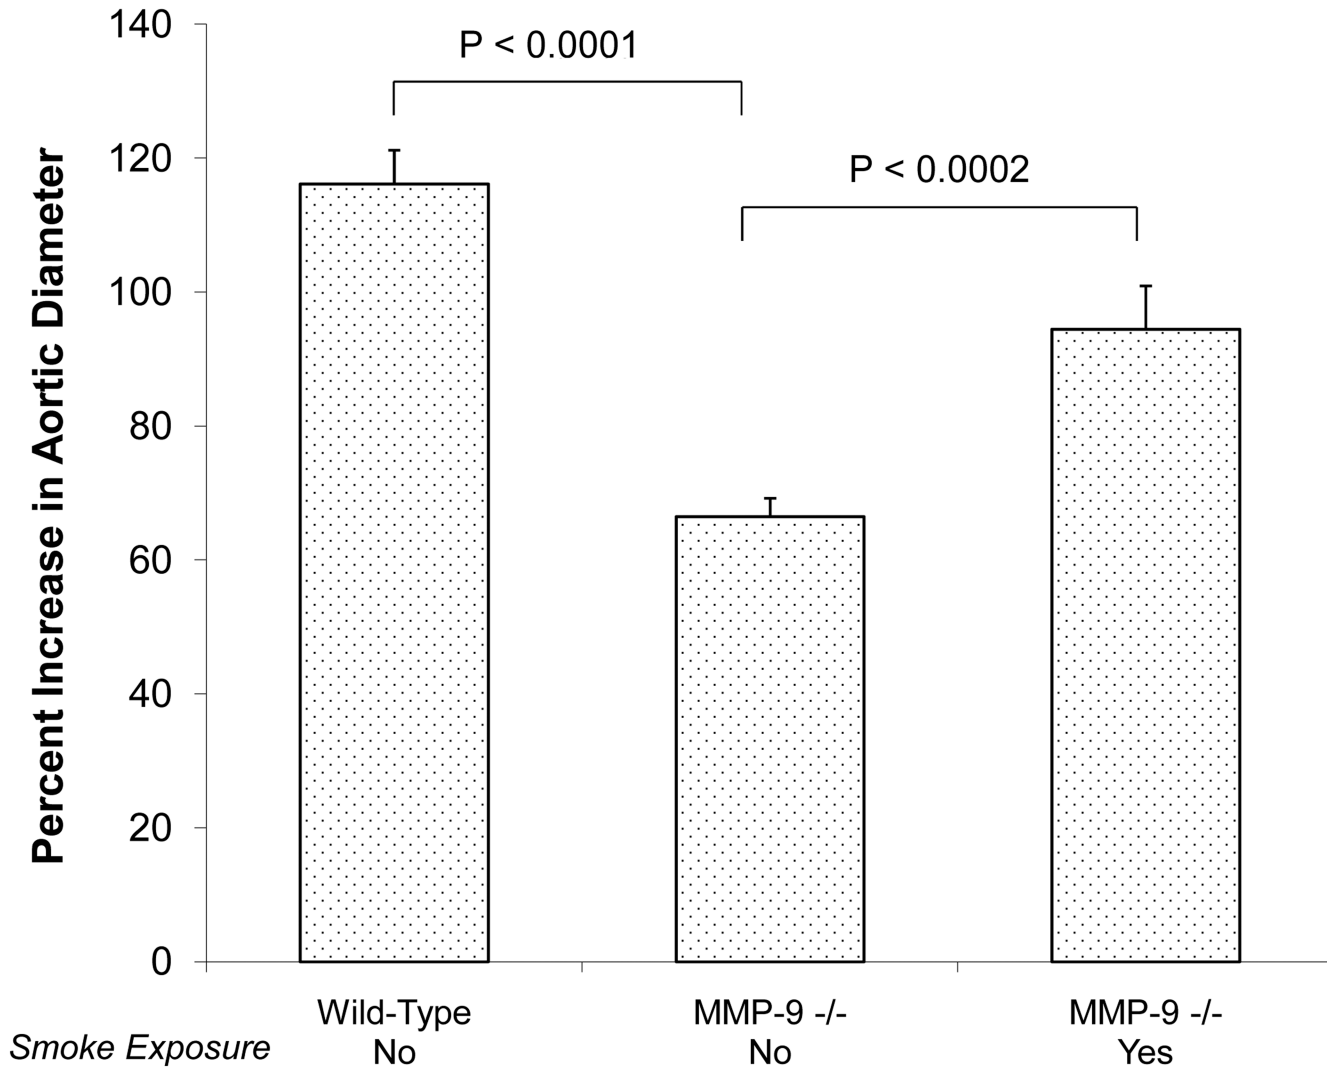

**Figure I: Effect of tobacco smoke exposure and MMP-9 deficiency in 129/SvEv mice**

Consistent with previous studies, the absence of MMP-9 in smoke-free 129/SvEv mice significantly reduced the overall increase in  $\% \Delta AD$ , from  $116 \pm 5\%$  to  $66 \pm 3\%$  ( $n=18$  and  $n=8$  respectively,  $P < 0.0001$ ), as well as the incidence of AAAs (maximal  $\% \Delta AD \geq 100\%$ ), from 78% to 0% ( $P < 0.0002$  by Chi-Squared). However, when MMP-9  $-/-$  129/SvEv mice ( $n=6$ ) were exposed to TS there was a significant increase in the extent of aortic dilatation ( $94 \pm 6\%$ ) compared to smoke-free MMP-9  $-/-$  mice ( $P < 0.0002$ ), with a substantially higher incidence of AAAs (22%)

A

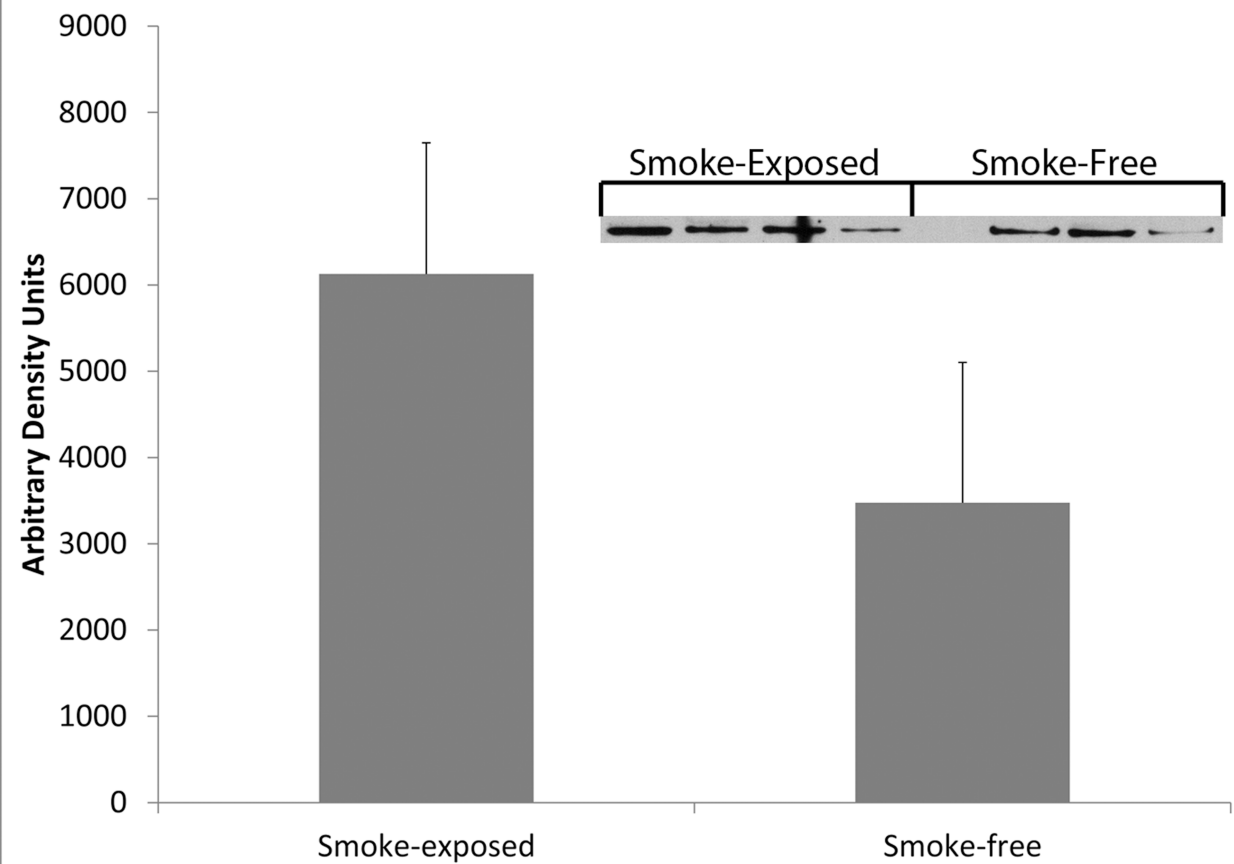

B

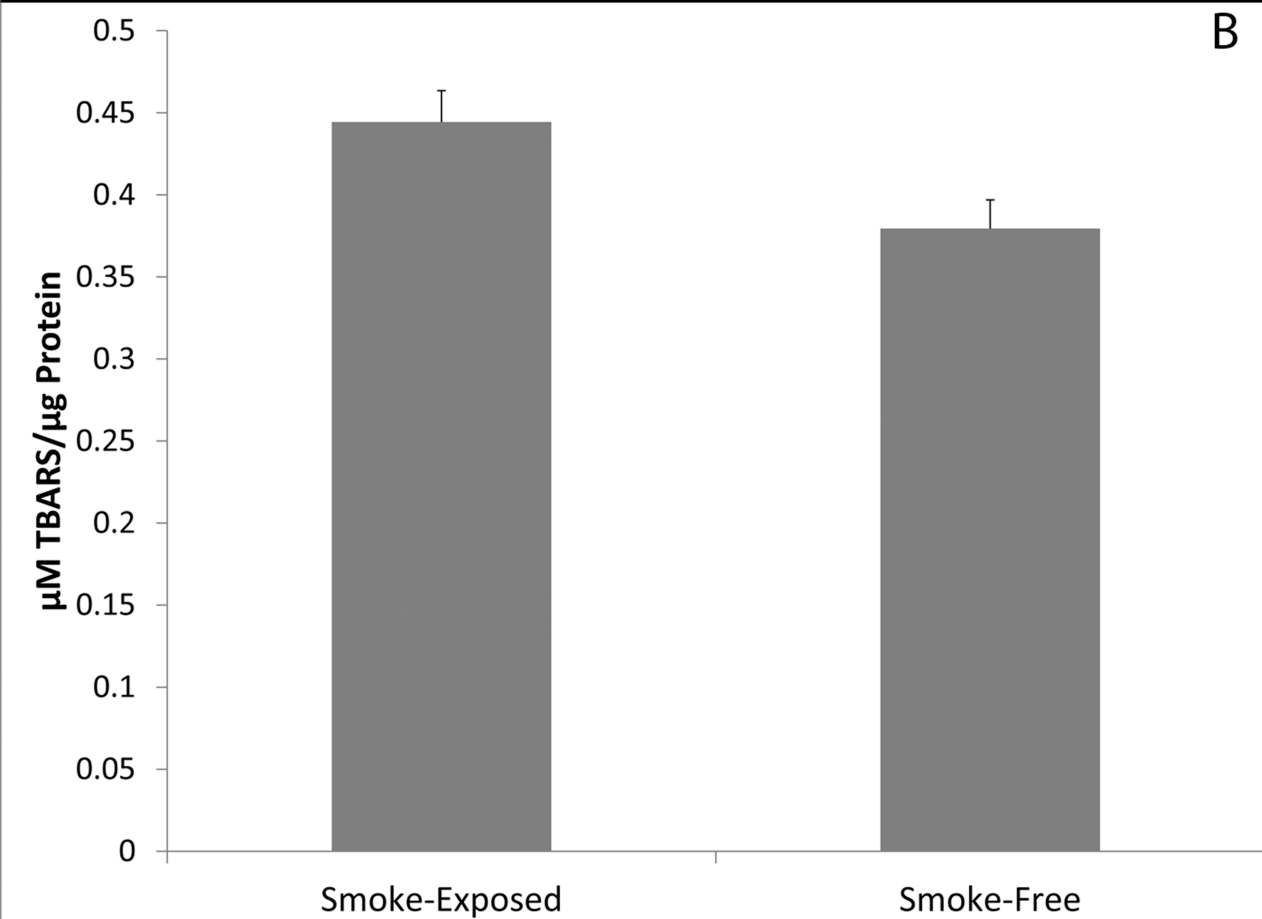

**Figure II: No change in Oxidative Stress or Tissue Oxidation in the aortas of animals exposed to tobacco smoke.**

Aortic tissue was removed from C57/Bl6 mice after 6 weeks of exposure to tobacco smoke or from littermate mice maintained for an identical period of time in smoke-free conditions. Protein was extracted from the tissues and analyzed for markers of oxidative stress and tissue oxidation. **(A)** Oxidative stress was evaluated with Heme oxygenase-1 production by Western blot (n=4 smoke-exposed and n=4 smoke-free), and tissue oxidation was evaluated by assaying for **(B)** thiobarbituric acid reactive substances (TBARS) (n=9 smoke-exposed and n=10 smoke-free). We did not find any significant difference in the results of these assays between smoke-exposed and smoke-free animals.
